# Supplementary material
Source: Springer Nature journal article supplement (https://www.springermedizin.de/resource/supplementary/12881_2011_873_MOESM3_ESM.pdf/9451254)
Supplement: MOESM3 [file 9451254]

*APOE*

*IDE*

*IL1B*

Non-epsilon4

rs2251101 T

rs1143627 T

rs16944 C

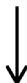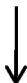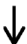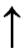

Ide

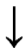

Il1b

ApoE4(-)

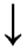

Insulin

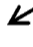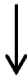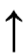

Ketone body  
metabolism

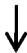

Cognitive improvement  
in AD
